# Supplementary material for: Assessing the Functional Redundancy between P-gp and BCRP in Controlling the Brain Distribution and Biliary Excretion of Dual Substrates with PET Imaging in Mice
Source: MDPI journal article supplement (doi:10.3390/pharmaceutics13081286), 2021-08-18
Supplement: s1 [file s1]

# Supplementary Materials: Assessing the Functional Redundancy between P-gp and BCRP in Controlling the Brain Distribution and Biliary Excretion of Dual Substrates with PET Imaging in Mice

Irene Hernández-Lozano, Severin Mairinger, Alexander Traxl, Michael Sauberer, Thomas Filip, Johann Stanek, Claudia Kuntner, Thomas Wanek and Oliver Langer

**Table S1.** Area under the curve (AUC) values for blood, brain, liver and intestine time-activity curves for [<sup>11</sup>C]tariquidar, [<sup>11</sup>C]erlotinib and [<sup>11</sup>C]elacridar in wild-type, *Abcb1a/b*<sup>(-/-)</sup>, *Abcg2*<sup>(-/-)</sup> and *Abcb1a/b*<sup>(-/-)</sup>*Abcg2*<sup>(-/-)</sup> mice.

| Radiotracer                  | AUC<br>(%ID/mL x min)    | Wild-type  | <i>Abcb1a/b</i> <sup>(-/-)</sup> | <i>Abcg2</i> <sup>(-/-)</sup> | <i>Abcb1a/b</i> <sup>(-/-)</sup> <i>Abcg2</i> <sup>(-/-)</sup> |
|------------------------------|--------------------------|------------|----------------------------------|-------------------------------|----------------------------------------------------------------|
| [ <sup>11</sup> C]tariquidar | AUC <sub>blood</sub>     | 403 ± 40   | 496 ± 51                         | 641 ± 63                      | 532 ± 36                                                       |
|                              | AUC <sub>brain</sub>     | 45 ± 2     | 89 ± 3                           | 55 ± 23                       | 319 ± 58                                                       |
|                              | AUC <sub>liver</sub>     | 1400 ± 67  | 1579 ± 67                        | 1601 ± 77                     | 1433 ± 92                                                      |
|                              | AUC <sub>intestine</sub> | 416 ± 48   | 507 ± 28                         | 497 ± 33                      | 393 ± 47                                                       |
| [ <sup>11</sup> C]erlotinib  | AUC <sub>blood</sub>     | 326 ± 30   | 328 ± 26                         | 359 ± 29                      | 317 ± 29                                                       |
|                              | AUC <sub>brain</sub>     | 62 ± 2     | 82 ± 7                           | 81 ± 5                        | 154 ± 7                                                        |
|                              | AUC <sub>liver</sub>     | 1300 ± 152 | 1199 ± 106                       | 1485 ± 101                    | 1375 ± 93                                                      |
|                              | AUC <sub>intestine</sub> | 1173 ± 121 | 1023 ± 127                       | 811 ± 67                      | 622 ± 66                                                       |
| [ <sup>11</sup> C]elacridar  | AUC <sub>blood</sub>     | 435 ± 72   | 455 ± 85                         | 749 ± 203                     | 469 ± 69                                                       |
|                              | AUC <sub>brain</sub>     | 61 ± 13    | 99 ± 15                          | 74 ± 7                        | 243 ± 28                                                       |
|                              | AUC <sub>liver</sub>     | 1388 ± 121 | 1351 ± 168                       | 1672 ± 148                    | 1362 ± 57                                                      |
|                              | AUC <sub>intestine</sub> | 390 ± 20   | 430 ± 35                         | 584 ± 71                      | 398 ± 28                                                       |

AUC values are given as mean ± SD (*n* = 4–5 per group).

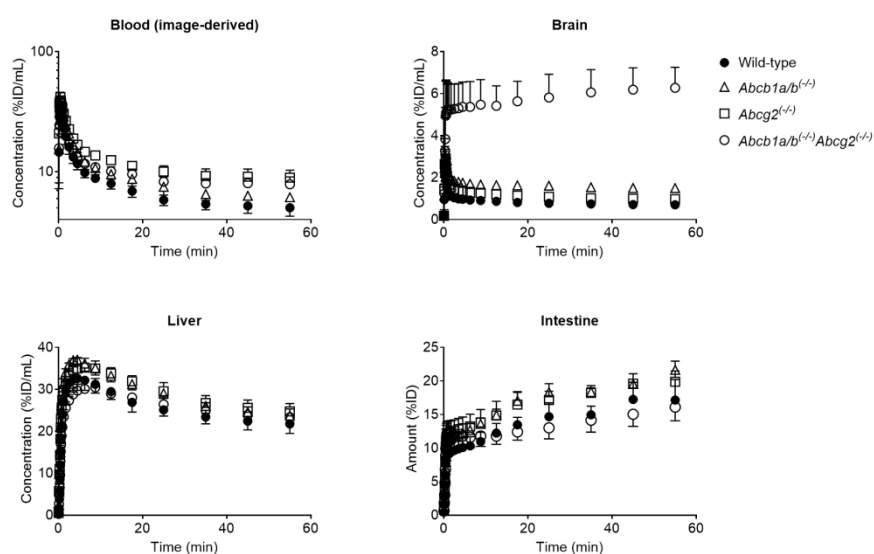

**Figure S1.** Mean time-activity curves (%ID/mL or %ID ± SD) of [11C]tariquidar in the blood (image-derived blood curve from the left ventricle of the heart), brain, liver and intestine in wild-type (●), *Abcb1a/b*<sup>-/-</sup> (Δ), *Abcg2*<sup>-/-</sup> (□), and *Abcb1a/b*<sup>-/-</sup>*Abcg2*<sup>-/-</sup> (○) mice.

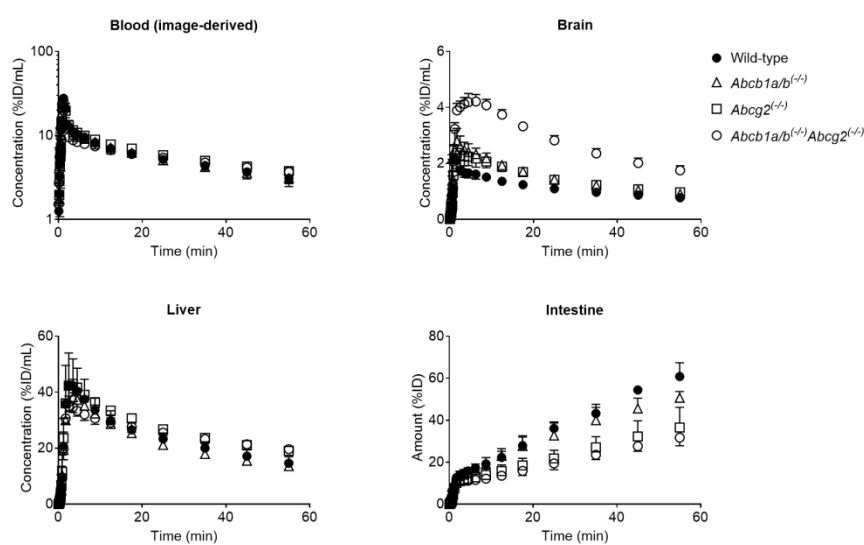

**Figure S2.** Mean time-activity curves (%ID/mL or %ID ± SD) of [11C]erlotinib in the blood (image-derived blood curve from the left ventricle of the heart), brain, liver and intestine in wild-type (●), *Abcb1a/b*<sup>-/-</sup> (Δ), *Abcg2*<sup>-/-</sup> (□), and *Abcb1a/b*<sup>-/-</sup>*Abcg2*<sup>-/-</sup> (○) mice.

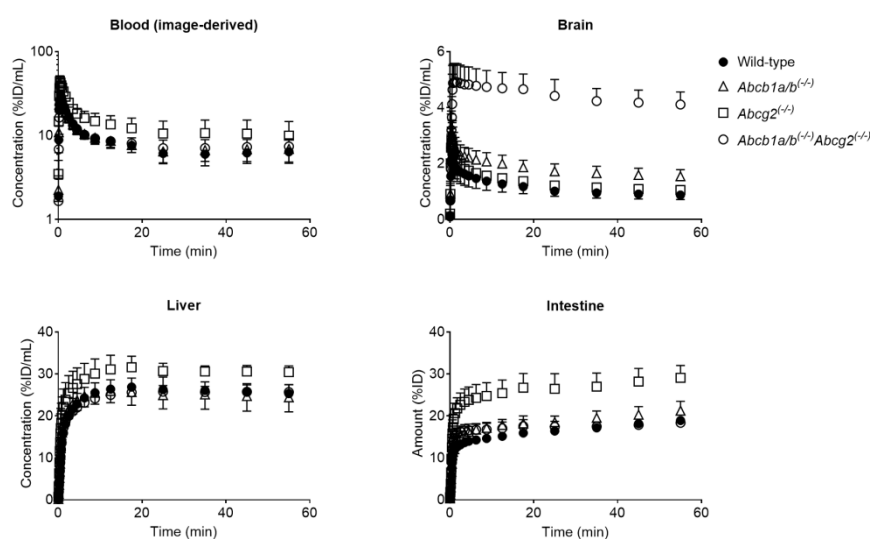

**Figure S3.** Mean time-activity curves (%ID/mL or %ID ± SD) of [11C]elacridar in the blood (image-derived blood curve from the left ventricle of the heart), brain, liver and intestine in wild-type (●), *Abcb1a/b*<sup>(-/-)</sup> (Δ), *Abcg2*<sup>(-/-)</sup> (□), and *Abcb1a/b*<sup>(-/-)</sup>*Abcg2*<sup>(-/-)</sup> (○) mice.

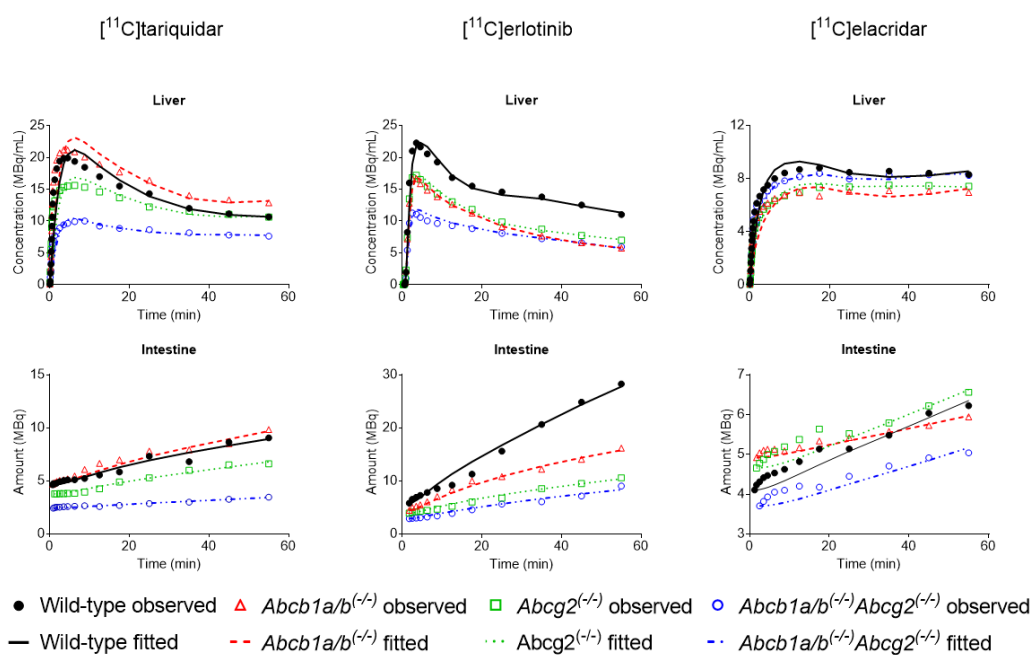

**Figure S4.** Observed and fitted time-activity curves (MBq/mL or MBq) of [11C]tariquidar, [11C]erlotinib and [11C]elacridar in the liver and intestine in one representative wild-type, *Abcb1a/b*<sup>(-/-)</sup>, *Abcg2*<sup>(-/-)</sup> and *Abcb1a/b*<sup>(-/-)</sup>*Abcg2*<sup>(-/-)</sup> mouse.

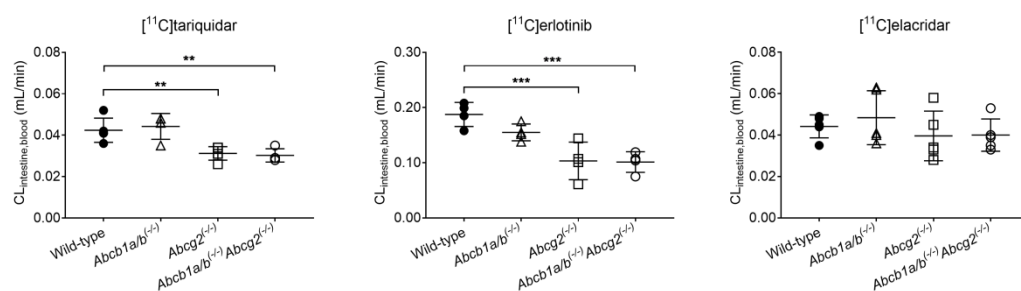

**Figure S5.** Intestinal clearance ( $CL_{\text{intestine,blood}}$ ) obtained by non-compartmental analysis for  $[^{11}\text{C}]$ tariquidar,  $[^{11}\text{C}]$ erlotinib and  $[^{11}\text{C}]$ elacridar in wild-type,  $Abcb1a/b^{-/-}$ ,  $Abcg2^{-/-}$  and  $Abcb1a/b^{-/-}Abcg2^{-/-}$  mice. \*\*  $p \leq 0.01$ , \*\*\*  $p \leq 0.001$ , one-way ANOVA followed by a Dunnett's multiple comparison test against the reference group (wild-type).
